# Supplementary material for: Cobalt/polypyrrole nanocomposites with controllable electromagnetic properties
Source: Royal Society of Chemistry journal article supplement (doi:10.1039/c4nr06978a), 2015-01-01
Supplement: c4nr06978a1.pdf [file c4nr06978a1.pdf]

## Electronic Supplementary Information

### Cobalt/Polypyrrole Nanocomposites with Controllable Electromagnetic Properties

*Haicheng Wang,<sup>a</sup> Ning Ma<sup>a</sup>, Zhiran Yan<sup>a</sup>, Ling Deng<sup>a</sup>, Jun He<sup>b\*</sup>, Yanglong Hou<sup>c</sup>, Yong Jiang<sup>a</sup>,  
and Guanghua Yua<sup>\*</sup>*

<sup>a</sup> *School of Materials Science and Engineering, University of Science and Technology Beijing, Beijing, 100083, P.R.China.*

<sup>b</sup> *Institute of Functional Materials, Central Iron & Steel Research Institute, Beijing, 100081, P.R.China.*

<sup>c</sup> *Department of Advanced Materials and Nanotechnology, College of Engineering, Peking University, Beijing, 100871, P.R.China.*

\* Corresponding authors. E-mail: [ghyu@mater.ustb.edu.cn](mailto:ghyu@mater.ustb.edu.cn); [hejun@cisri.com.cn](mailto:hejun@cisri.com.cn)

**This file includes:**

**Materials and Methods**

**Figure S1 to S3**

## Materials and Methods

Figure 6 is a contour map made by ORIGIN (V9.0). The sample thickness was set as the  $X$  axis, and the absorbing frequency was set as the  $Y$  axis. Each closed curve is a contour curve corresponding different reflection loss value. Thus, it could show the absorbing bandwidth (with  $RL < -10\text{dB}$ ) at different thickness. The maximum height of each pattern just means the bandwidth at each thickness.

## Supplementary Figures

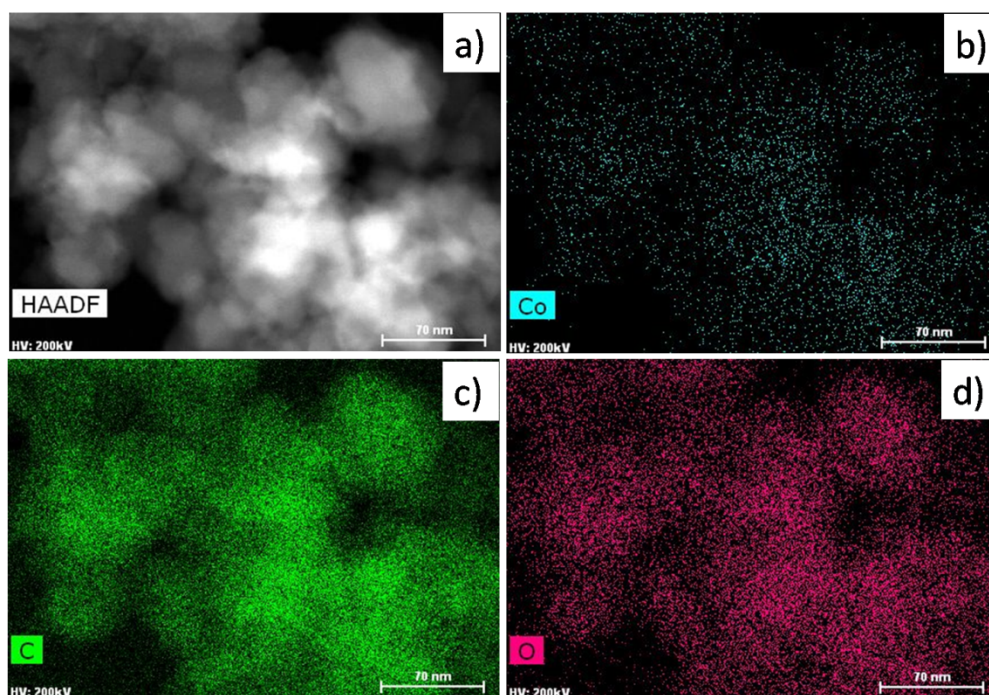

Figure S1 STEM-EDS element mapping of composites (a): cobalt (b), carbon (c), oxygen (d). These mapping images were taken from another place in the composites. It can be seen that, cobalt has a relatively even distribution in the Co/PPy nanocomposites.

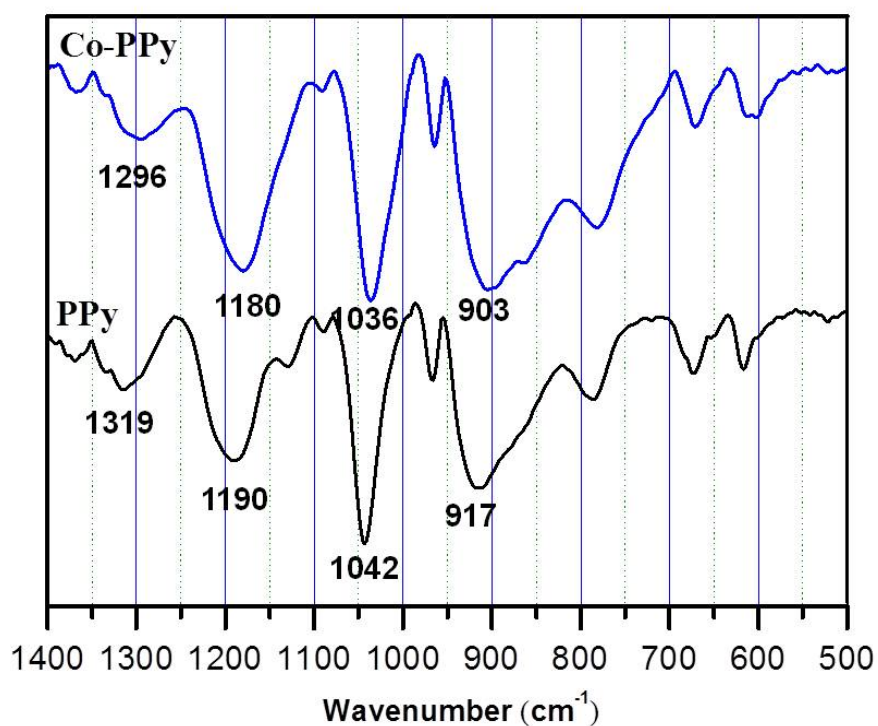

Figure S2 FT-IR spectra of PPy and Co/PPy composites. It can be seen that the absorption bands at about 1190 and 917 cm<sup>-1</sup> (the stretching vibration of doped PPy), and bands at about 1042 cm<sup>-1</sup> (the C-H deformation vibrations) and 1319 cm<sup>-1</sup> (C-N stretching vibrations) shifted to smaller wavenumbers after the nanocomposition with Co nanoparticles. These shifts, especially the shift of C-N stretching vibrations (from 1319 to 1296 cm<sup>-1</sup>) can prove the existence of the strong interaction between Co NPs and pyrrole moieties in PPy polymers.

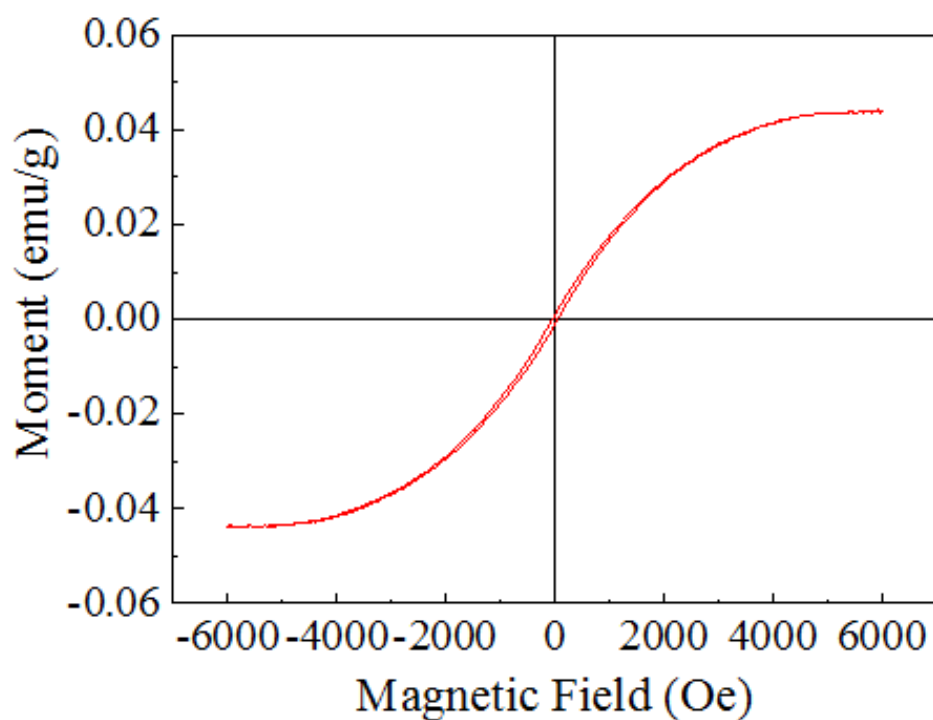

Figure S3  $M$ - $H$  loop of Co/PPy composites. The  $M_s$  value of the composite decreased comparing with that of cobalt particles. This can be easily understood that the cobalt particles are magnetic, while the PPy is nonmagnetic, and then the magnetic moment of Co/PPy composites was lower than that of pure cobalt particles since there is a very small fraction of cobalt particles in the composites.
